# Supplementary material for: Dispersal syndromes and the use of life-histories to predict dispersal
Source: PubMed Central journal article supplement (PMC3684744; doi:10.1111/eva.12049), 2013-02-11
Supplement: eva0006-0630-SD2.pdf [file eva0006-0630-SD2.pdf]

1 **Supplementary material for Dispersal syndromes and the use of life-histories to predict**  
2 **dispersal by Stevens VM, Trochet A, Blanchet S, Moulherat S, Clobert J & Baguette M**

3

4 **1. Identification of quadratic relationships between dispersal and species traits**

5 A preliminary analysis of the relationships between dispersal measurements and butterfly  
6 traits allowed to identify putatively non-linear relationships between traits. When the effect of  
7 the quadratic term of a trait was even marginally significant in a GLM (i.e. with  $P < 0.10$ ), the  
8 trait effect was modeled with a polynomial effect of degree 2 in the model construction for  
9 predictive models. Table A1 summarizes this preliminary analysis.

10 Table A1. Summary of 64 generalized linear models (GLM) with each of four dispersal measurements as the response and each of 16 species traits and their quadratic effect  
 11 proposed as explanatory variables.

| Independent variable | Model parameters                | Frequency of long-      |             |             |                    |             |             |                      |      |       |           |      |       |
|----------------------|---------------------------------|-------------------------|-------------|-------------|--------------------|-------------|-------------|----------------------|------|-------|-----------|------|-------|
|                      |                                 | Mean dispersal distance |             |             | distance dispersal |             |             | Dispersal propensity |      |       | Gene flow |      |       |
|                      |                                 | Est.                    | SE          | P> t        | Est.               | SE          | P> t        | Est.                 | SE   | P> t  | Est.      | SE   | P> t  |
| Fecundity            | Intercept                       | -2.40                   | 0.55        | <0.01       | -2.48              | 0.63        | <0.01       | -0.72                | 0.15 | <0.01 | 0.67      | 0.08 | <0.01 |
|                      | Fecundity                       | -0.04                   | 0.26        | 0.87        | -0.03              | 0.29        | 0.91        | -0.08                | 0.08 | 0.38  | 0.04      | 0.04 | 0.31  |
|                      | Fecundity <sup>2</sup>          | 0.03                    | 0.02        | 0.23        | 0.03               | 0.03        | 0.39        | 0.01                 | 0.01 | 0.26  | 0.00      | 0.00 | 0.93  |
| Adult lifetime       | Intercept                       | -3.77                   | 1.39        | <0.05       | -4.11              | 1.39        | <0.01       | -1.05                | 0.29 | <0.01 | 0.73      | 0.13 | <0.01 |
|                      | Adult lifetime                  | 0.19                    | 0.15        | 0.23        | 0.24               | 0.15        | 0.12        | 0.02                 | 0.03 | 0.44  | 0.00      | 0.01 | 0.68  |
|                      | Adult lifetime <sup>2</sup>     | -0.00                   | 0.00        | 0.28        | <b>-0.01</b>       | <b>0.00</b> | <b>0.09</b> | -0.00                | 0.00 | 0.50  | 0.00      | 0.00 | 0.89  |
| Voltinism            | Intercept                       | -0.14                   | 1.37        | 0.92        | -1.63              | 1.49        | 0.29        | -0.12                | 0.45 | 0.80  | 0.75      | 0.29 | <0.05 |
|                      | Voltinism                       | -1.48                   | 0.91        | 0.11        | -0.62              | 0.99        | 0.54        | -0.43                | 0.32 | 0.19  | 0.02      | 0.20 | 0.93  |
|                      | Voltinism <sup>2</sup>          | <b>0.25</b>             | <b>0.12</b> | <b>0.05</b> | 0.14               | 0.14        | 0.32        | 0.05                 | 0.05 | 0.28  | 0.00      | 0.03 | 0.89  |
| Larval growth rate   | Intercept                       | -0.72                   | 0.51        | 0.17        | -0.61              | 0.50        | 0.23        | -0.63                | 0.21 | <0.01 | 0.95      | 0.10 | <0.01 |
|                      | Larval growth rate              | -0.03                   | 0.01        | <0.05       | -0.03              | 0.01        | <0.05       | -0.00                | 0.01 | 0.43  | 0.00      | 0.00 | 0.32  |
|                      | Larval growth rate <sup>2</sup> | -0.00                   | 0.00        | 0.14        | <b>0.00</b>        | <b>0.00</b> | <b>0.09</b> | 0.00                 | 0.00 | 0.43  | 0.00      | 0.00 | 0.40  |
| Ripe egg load        | Intercept                       | -2.75                   | 0.70        | <0.01       | -2.84              | 0.71        | <0.01       | -0.79                | 0.11 | <0.01 | 0.84      | 0.09 | <0.01 |

|                     |                                  |              |             |                 |              |             |                 |              |             |                 |       |      |       |
|---------------------|----------------------------------|--------------|-------------|-----------------|--------------|-------------|-----------------|--------------|-------------|-----------------|-------|------|-------|
|                     | Ripe egg load                    | 0.33         | 0.32        | 0.31            | 0.37         | 0.33        | 0.27            | -0.02        | 0.06        | 0.67            | -0.03 | 0.04 | 0.50  |
|                     | Ripe egg load <sup>2</sup>       | -0.03        | 0.03        | 0.41            | -0.04        | 0.03        | 0.28            | 0.00         | 0.01        | 0.51            | 0.01  | 0.00 | 0.18  |
| Ovigeny index       | Intercept                        | -1.44        | 0.21        | <0.01           | -1.94        | 0.25        | <0.01           | -0.78        | 0.05        | <0.01           | 0.90  | 0.03 | <0.01 |
|                     | Ovigeny index                    | -4.21        | 1.43        | <0.01           | -2.60        | 1.78        | 0.16            | -0.07        | 0.42        | 0.86            | -0.47 | 0.27 | 0.10  |
|                     | Ovigeny index <sup>2</sup>       | <b>3.56</b>  | <b>1.38</b> | <b>&lt;0.05</b> | 2.26         | 1.71        | 0.15            | 0.03         | 0.39        | 0.94            | 0.34  | 0.27 | 0.21  |
| Female maturation   | Intercept                        | -1.13        | 0.82        | 0.18            | -1.72        | 0.75        | <0.05           | -0.55        | 0.14        | <0.01           | 0.63  | 0.10 | <0.01 |
|                     | Female maturation                | -0.68        | 0.56        | 0.23            | -0.08        | 0.52        | 0.88            | -0.20        | 0.09        | <0.05           | 0.10  | 0.07 | 0.13  |
|                     | Female maturation <sup>2</sup>   | 0.12         | 0.08        | 0.18            | -0.02        | 0.08        | 0.81            | <b>0.03</b>  | <b>0.01</b> | <b>&lt;0.05</b> | -0.01 | 0.01 | 0.32  |
| Overwintering stage | Intercept                        | -1.82        | 0.53        | <0.01           | -2.32        | 0.56        | <0.01           | -0.71        | 0.19        | <0.01           | 0.92  | 0.09 | <0.01 |
|                     | Overwintering stage              | -0.28        | 0.29        | 0.34            | -0.06        | 0.30        | 0.84            | -0.05        | 0.21        | 0.82            | -0.08 | 0.06 | 0.22  |
|                     | Overwintering stage <sup>2</sup> | <b>0.06</b>  | <b>0.03</b> | <b>0.07</b>     | 0.04         | 0.04        | 0.33            | 0.00         | 0.05        | 0.95            | 0.02  | 0.01 | 0.13  |
| Flight period       | Intercept                        | -4.30        | 1.08        | <0.01           | -5.66        | 0.85        | <0.01           | -0.98        | 0.23        | <0.01           | 0.69  | 0.07 | <0.01 |
|                     | Flight period                    | 0.58         | 0.27        | <0.05           | 0.97         | 0.21        | <0.01           | 0.04         | 0.06        | 0.49            | 0.02  | 0.01 | 0.08  |
|                     | Flight period <sup>2</sup>       | <b>-0.03</b> | <b>0.01</b> | <b>&lt;0.05</b> | <b>-0.06</b> | <b>0.01</b> | <b>&lt;0.01</b> | -0.00        | 0.00        | 0.56            | -0.00 | 0.00 | 0.23  |
| Thermal tolerance   | Intercept                        | -3.14        | 0.79        | <0.01           | -2.52        | 0.84        | <0.01           | -1.07        | 0.12        | <0.01           | 0.59  | 0.16 | <0.01 |
|                     | Thermal tolerance                | 0.51         | 0.33        | 0.13            | 0.21         | 0.35        | 0.55            | 0.15         | 0.05        | <0.01           | 0.07  | 0.06 | 0.26  |
|                     | Thermal tolerance <sup>2</sup>   | -0.04        | 0.03        | 0.15            | -0.02        | 0.03        | 0.52            | <b>-0.01</b> | <b>0.00</b> | <b>&lt;0.01</b> | -0.00 | 0.01 | 0.47  |
| Adult habitat range | Intercept                        | -0.51        | 0.70        | 0.47            | -1.46        | 0.81        | 0.08            | -0.64        | 0.16        | <0.01           | 0.67  | 0.07 | <0.01 |
|                     | Adult habitat range              | -1.75        | 0.66        | <0.05           | -0.93        | 0.75        | 0.23            | -0.17        | 0.15        | 0.27            | 0.08  | 0.04 | 0.10  |

|                        |                                     |              |             |                 |       |       |       |              |             |                 |       |      |       |
|------------------------|-------------------------------------|--------------|-------------|-----------------|-------|-------|-------|--------------|-------------|-----------------|-------|------|-------|
|                        | Adult habitat range <sup>2</sup>    | <b>0.39</b>  | <b>0.13</b> | <b>&lt;0.01</b> | 0.23  | 0.15  | 0.15  | 0.04         | 0.03        | 0.25            | -0.00 | 0.01 | 0.50  |
| Larval dietary breadth | Intercept                           | -3.35        | 1.64        | 0.05            | -1.83 | 1.68  | 0.28  | -1.27        | 0.22        | <0.01           | 0.90  | 0.15 | <0.01 |
|                        | Larval dietary breadth              | 0.97         | 1.21        | 0.43            | -0.03 | 1.22  | 0.98  | 0.39         | 0.18        | <0.05           | -0.05 | 0.12 | 0.71  |
|                        | Larval dietary breadth <sup>2</sup> | -0.16        | 0.21        | 0.47            | -0.02 | 0.21  | 0.94  | <b>-0.07</b> | <b>0.03</b> | <b>&lt;0.05</b> | 0.01  | 0.02 | 0.73  |
| Myrmecophily           | Intercept                           | -1.90        | 0.17        | <0.01           | -2.12 | 0.18  | <0.01 | -0.78        | 0.03        | <0.01           | 0.83  | 0.02 | <0.01 |
|                        | Myrmecophily                        | -0.28        | 0.43        | 0.52            | 0.09  | 0.27  | 0.74  | 0.09         | 0.09        | 0.34            | -0.06 | 0.05 | 0.25  |
|                        | Myrmecophily <sup>2</sup>           | 0.05         | 0.10        | 0.60            | -0.01 | 0.03  | 0.70  | -0.02        | 0.01        | 0.21            | 0.01  | 0.01 | 0.18  |
| Laying precision       | Intercept                           | -2.41        | 0.72        | <0.01           | -2.28 | 0.73  | <0.01 | -1.05        | 0.20        | <0.01           | 0.76  | 0.13 | <0.01 |
|                        | Laying precision                    | 0.08         | 0.33        | 0.81            | -0.06 | 0.34  | 0.86  | 0.19         | 0.12        | 0.12            | 0.02  | 0.06 | 0.69  |
|                        | Laying precision <sup>2</sup>       | 0.00         | 0.04        | 0.92            | 0.02  | 0.04  | 0.62  | <b>-0.03</b> | <b>0.02</b> | <b>0.10</b>     | -0.00 | 0.01 | 0.83  |
| Mate location          | Intercept                           | -2.72        | 0.95        | <0.01           | -2.03 | 0.88  | <0.05 | -0.94        | 0.20        | <0.01           | 0.79  | 0.16 | <0.01 |
|                        | Mate location                       | 0.87         | 0.63        | 0.18            | 0.28  | 0.62  | 0.66  | 0.12         | 0.13        | 0.39            | 0.02  | 0.11 | 0.85  |
|                        | Mate location <sup>2</sup>          | <b>-0.18</b> | <b>0.10</b> | <b>0.08</b>     | -0.09 | 0.10  | 0.39  | -0.02        | 0.02        | 0.35            | -0.00 | 0.02 | 0.92  |
| Wing size              | Intercept                           | -5.18        | 1.41        | <0.01           | -13.5 | 14.06 | 0.35  | -1.69        | 2.94        | 0.57            | -0.38 | 1.88 | 0.84  |
|                        | Log(wing size)                      | 0.24         | 0.12        | 0.07            | 5.99  | 9.29  | 0.52  | 0.29         | 0.92        | 0.88            | 0.80  | 1.28 | 0.54  |
|                        | Log(wing size) <sup>2</sup>         | -0.00        | 0.00        | 0.18            | -0.72 | 0.52  | 0.64  | 0.00         | 0.31        | 0.99            | -0.13 | 0.22 | 0.55  |

12 

---

 Bold cells show which effects should be modeled with polynomial effects in models aiming at predicting dispersal in butterflies (see main text).

13 2. Limits to predictions

14 Predictions from GLM might be problematic in case of skewed range of trait values in the  
15 informed dataset (i.e. the species with dispersal measurement available) relatively to the  
16 dataset to which the model will be applied. To identify such flaw, we compared the range of  
17 values for each trait to the range observed in the whole dataset (Figure A1). This comparison  
18 showed that the four informed datasets were skewed for a variety of traits. When traits with  
19 skewed range were retained by model selection, we restricted our predictions to butterflies  
20 with trait values within the range observed in the dataset from which the predictive model was  
21 built (i.e. in species with measured dispersal), as depicted in Fig. A2.

22

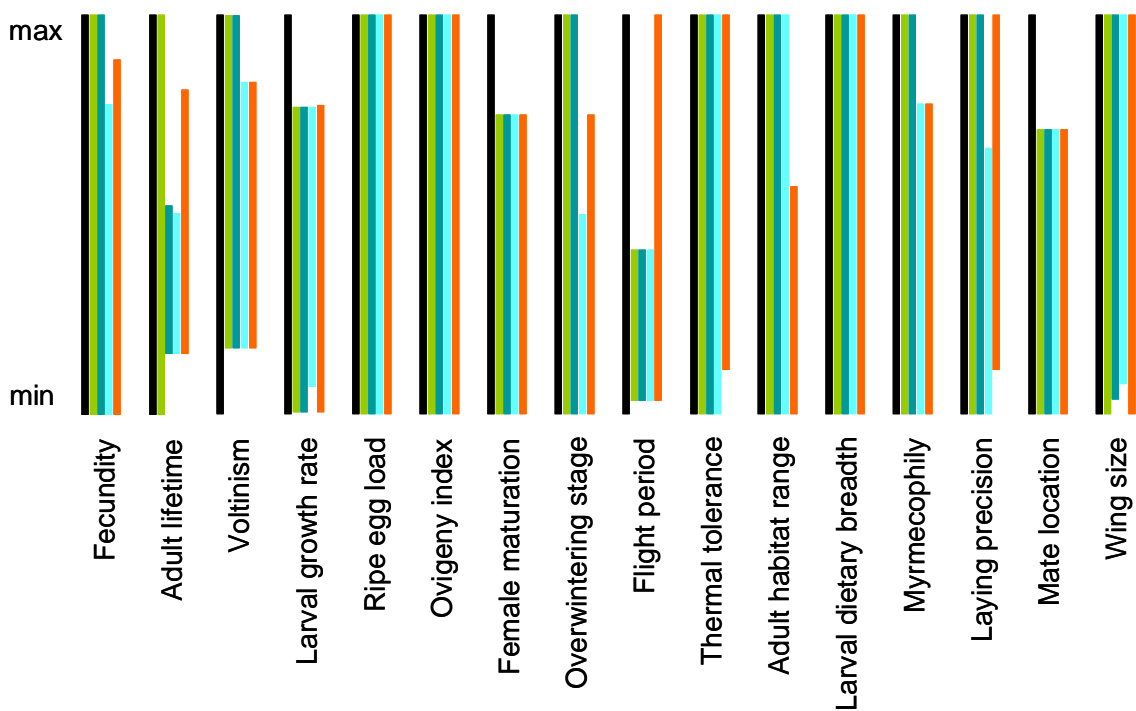

23

24 Figure A1. Range of trait values in subset of data comprising butterfly species with measured dispersal compared  
25 to range observed in 142 butterfly species of N-W Europe. Black: range with 142 species (scaled for reference);  
26 green: range in species with measured mean dispersal distances; dark blue: range in species with estimated  
27 probability of long-distance dispersal; light blue: range in species with measured dispersal propensity; orange:  
28 range in species with estimated gene flow.

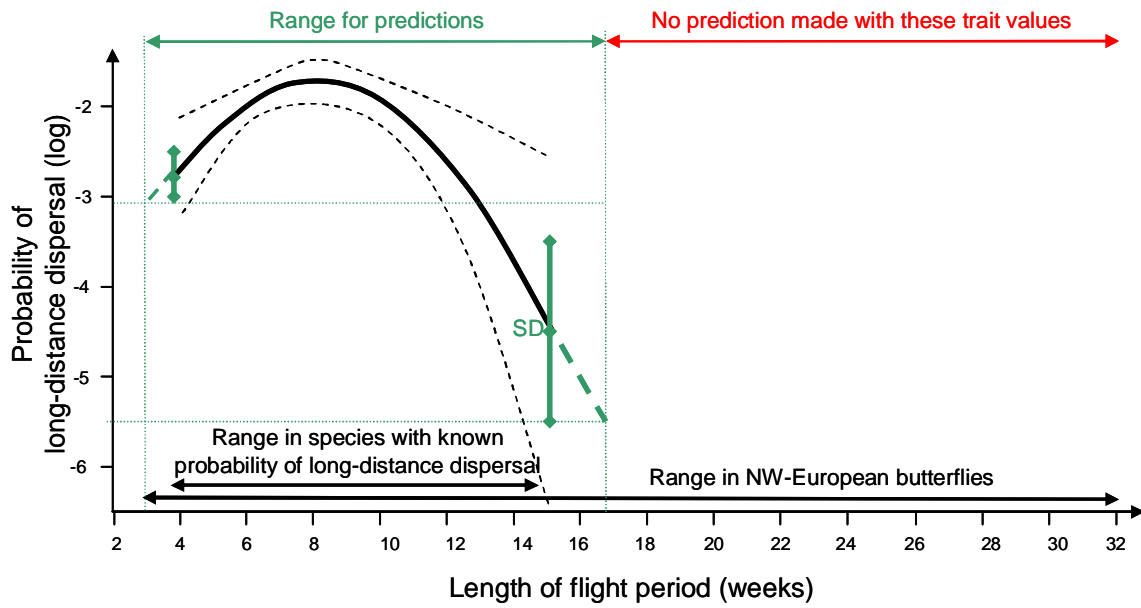

29

30 Figure A2. Illustration of a polynomial effect (dashed black curves = 95% CI) of the flight period in a predictive  
 31 model for the probability of long distance dispersal in butterflies. Butterflies with known probability of long-  
 32 distance dispersal have short to medium flight periods (4-15 weeks) while this dispersal measurement should be  
 33 predicted for species with short to very long flight periods (3-32 weeks). Green lines indicate how we enlarged  
 34 the range of values used for the predictions to 3-17 weeks, based on the standard deviation of the effect.

35 3. Trait models

36 We selected one single model to predict each dispersal measurement. Seven species traits and  
 37 some interactions among them were used in those predictive GLM. The top-ranked models  
 38 (i.e. within 2 points of AIC from the very best model) usually accept the same terms as the  
 39 one chosen for predictions, as shown in Table A2. Figs A3-A6 show the effect of each trait  
 40 retained in these models.

41 Table A2. Comparison of the predictive models to others top-ranked models in the selection on GLM. In each  
 42 case, model 1 is the model used for predictions. R<sup>2</sup> is unadjusted.

| Dispersal                                | Model #<br>( $\Delta AIC < 2$ ) | R <sup>2</sup> | Number of traits in<br>common with the<br>model finally retained | Number<br>of other<br>traits |
|------------------------------------------|---------------------------------|----------------|------------------------------------------------------------------|------------------------------|
| Dispersal propensity                     | 1                               | 0.62           | 4/4                                                              | 0                            |
|                                          | 2                               | 0.59           | 3/4                                                              | 1                            |
|                                          | 3                               | 0.59           | 3/4                                                              | 1                            |
|                                          | 4                               | 0.59           | 3/4                                                              | 1                            |
|                                          | 5                               | 0.59           | 3/4                                                              | 1                            |
|                                          | 6                               | 0.53           | 3/4                                                              | 0                            |
| Mean dispersal<br>distance               | 1                               | 0.86           | 7/7                                                              | 0                            |
|                                          | 2                               | 0.82           | 7/7                                                              | 0                            |
| Frequency of long-<br>distance dispersal | 1                               | 0.90           | 6/6                                                              | 0                            |
|                                          | 2                               | 0.88           | 5/6                                                              | 0                            |
|                                          | 3                               | 0.88           | 5/6                                                              | 0                            |
|                                          | 4                               | 0.88           | 4/6                                                              | 1                            |
|                                          | 5                               | 0.89           | 5/6                                                              | 1                            |
|                                          | 6                               | 0.81           | 3/6                                                              | 0                            |
|                                          | 7                               | 0.83           | 4/6                                                              | 0                            |
|                                          | 8                               | 0.85           | 4/6                                                              | 0                            |
|                                          | 9                               | 0.87           | 4/6                                                              | 0                            |
| Gene flow                                | 1                               | 0.77           | 4/4                                                              | 0                            |

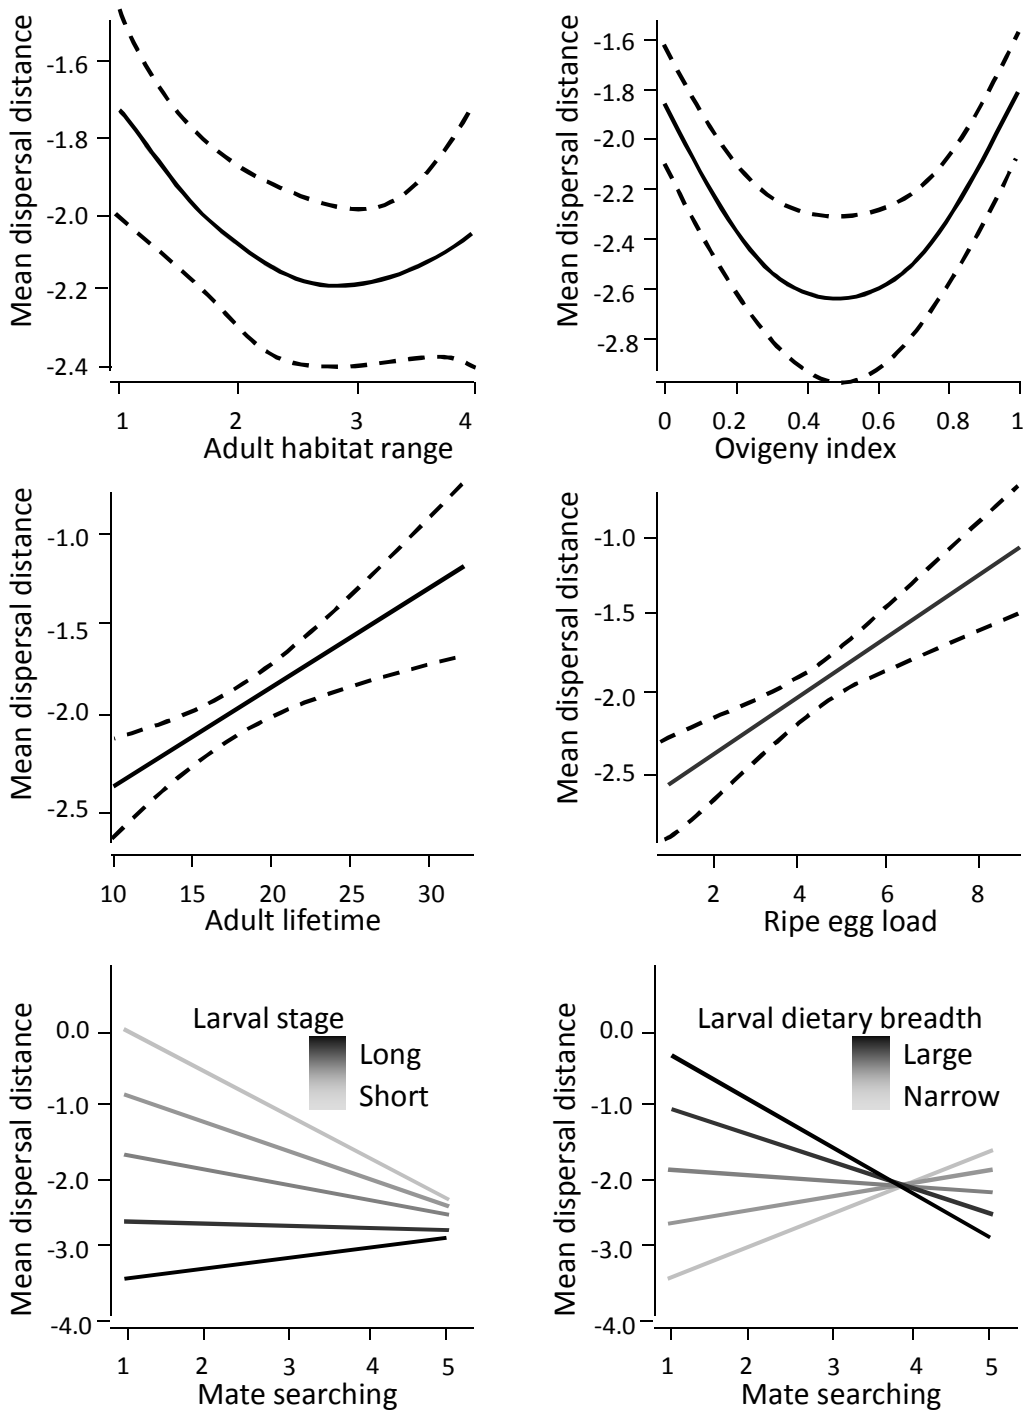

44

45 Figure A3. Illustration of the significant effects of traits and interactions between traits retained to predict the  
 46 mean dispersal distance in butterflies. Mean dispersal distance is shown on a ln km scale. The model is detailed  
 47 in Table 3 of main text. Effects are shown with 95% CI (dashed curves), except for interaction.

48



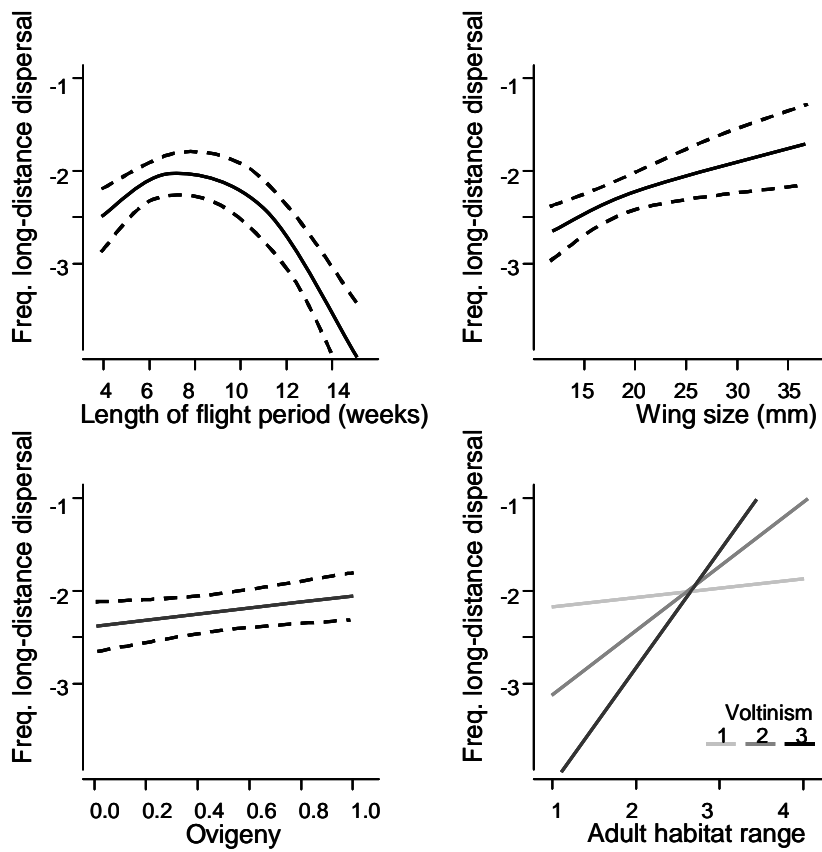

49

50 Figure A4. Illustration of the significant effects of traits and interactions between traits retained to predict the  
 51 frequency of long-distance dispersal in butterflies. Frequency of long-distance dispersal is shown on a log scale.  
 52 The model is detailed in Table 3 of main text. Effects are shown with 95%CI (dashed curves), except for  
 53 interaction.

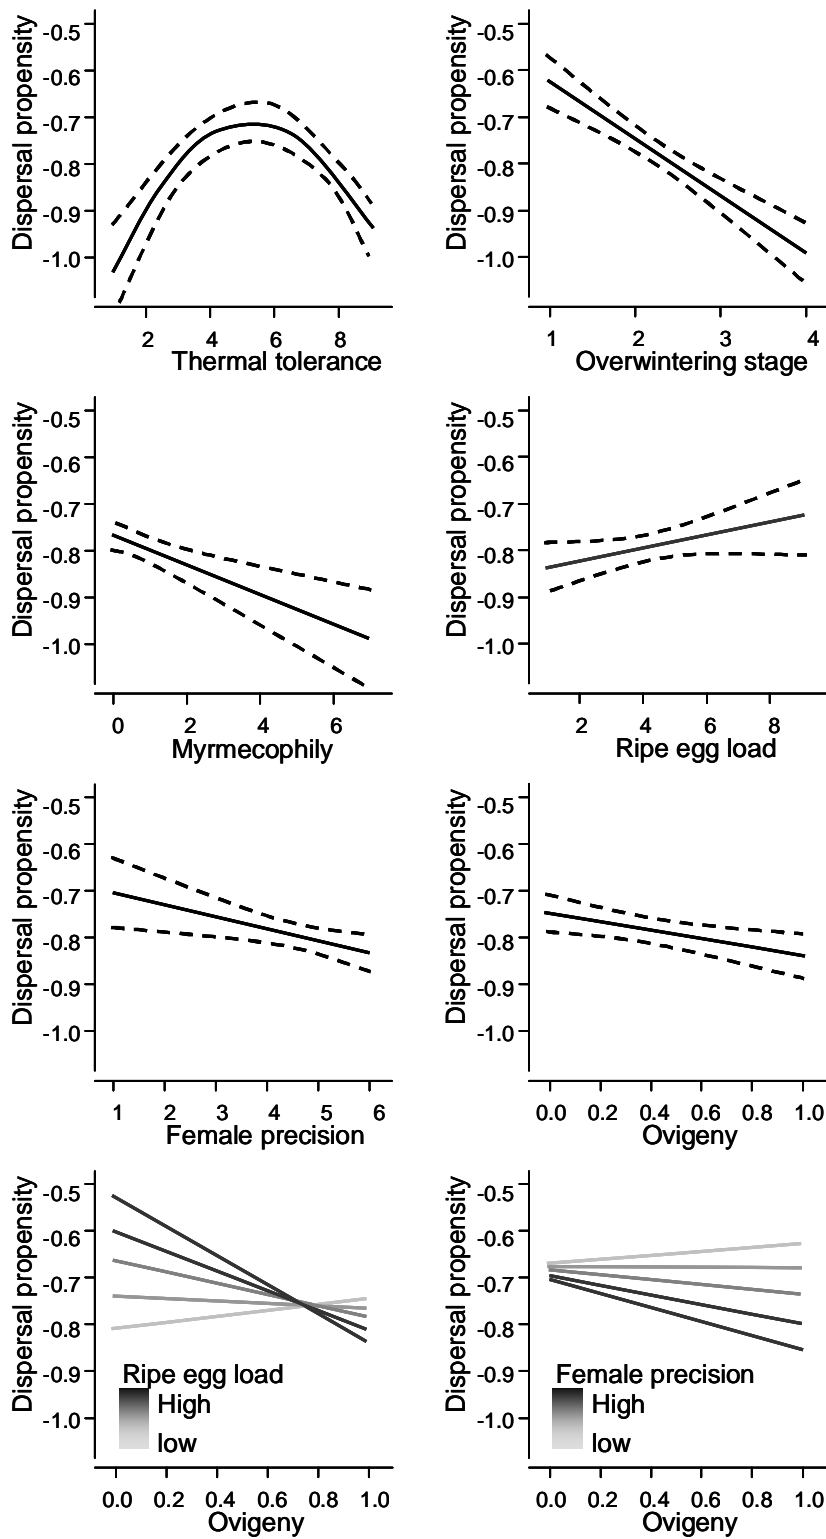

54

55 Figure A5. Illustration of the significant effects of traits and interactions between traits retained to predict the  
 56 dispersal propensity in butterflies. Dispersal propensity is 1- $\zeta$  proportion of residents. The model is detailed in  
 57 Table 3 of main text. Effects are shown with 95%CI (dashed curves), except for interactions where CI is not  
 58 shown.

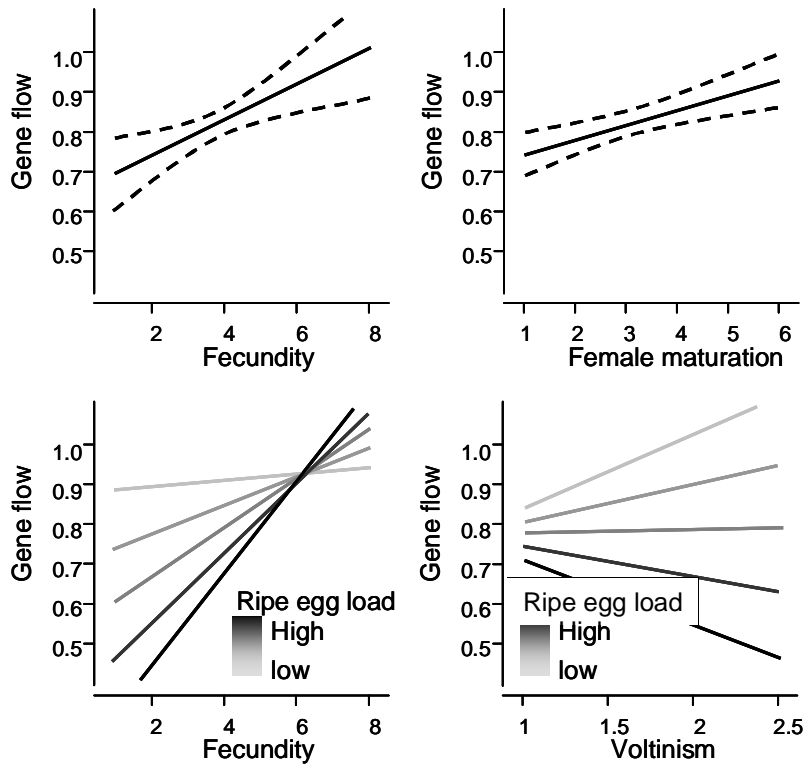

59

60 Figure A6. Illustration of the significant effects of traits and interactions between traits retained to predict the  
 61 intensity of gene flow in butterflies. Gene flow is  $\delta\zeta F_{ST}$ . The model is detailed in Table 3 of main text. Effects  
 62 are shown with 95%CI (dashed curves), except for interactions.

63 4. Inferences for butterfly dispersal from life-history traits

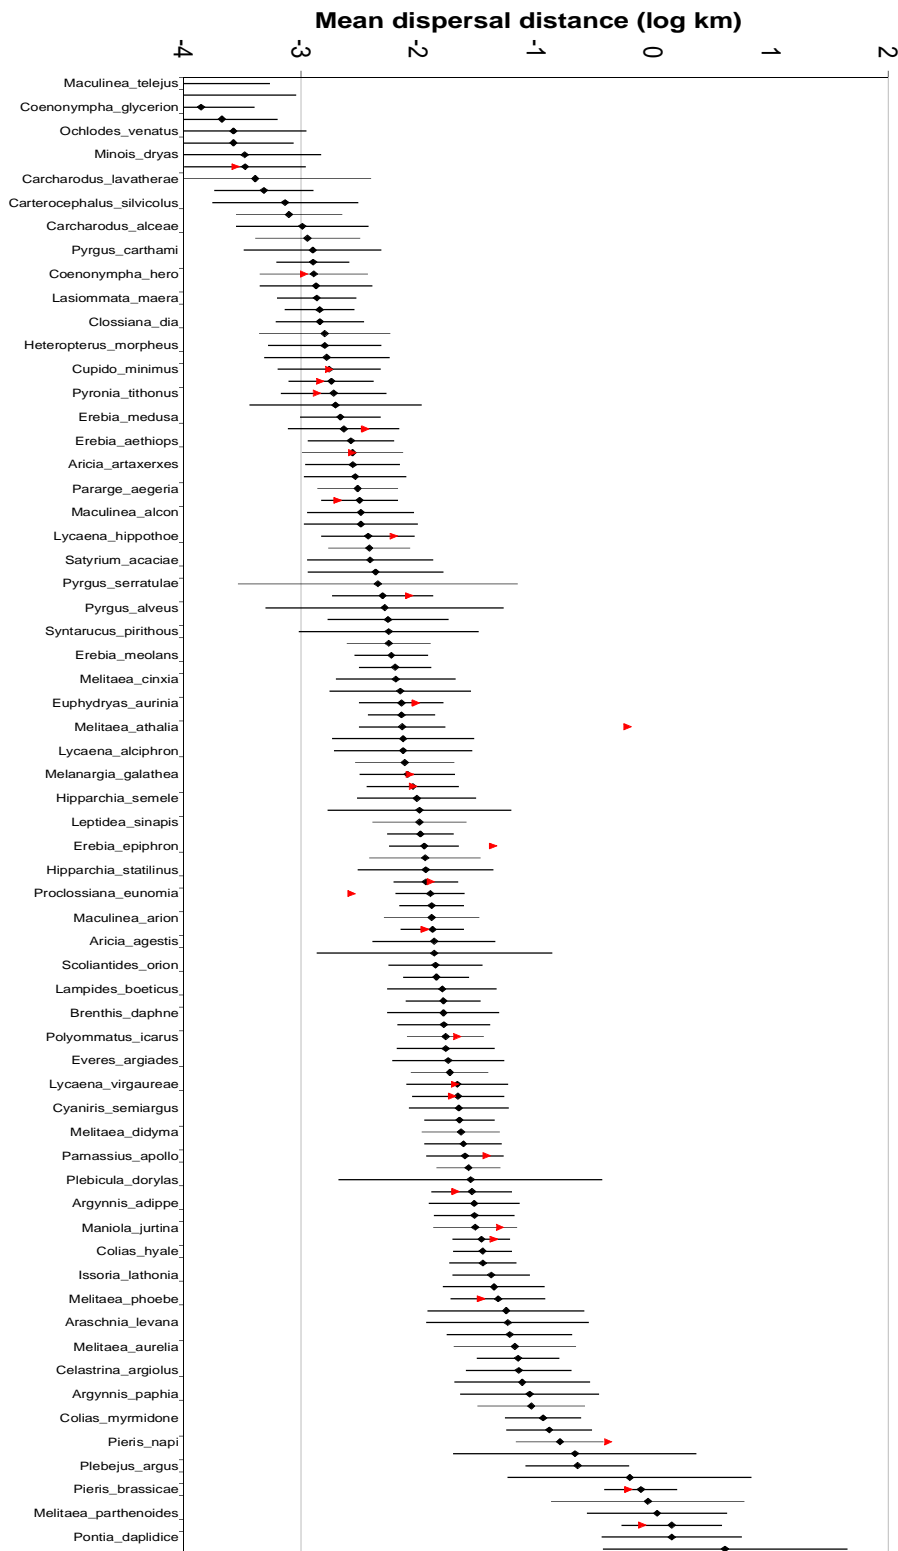

64

65 Figure A7. Mean dispersal distance predicted from life-history traits and wing size for 124 of the 142 butterfly

66 species of N-W Europe, and 95%CI of the predictions. Details of the model are shown in Table 3 of main text.

67 Red symbols show the observed value for 29 of those species.

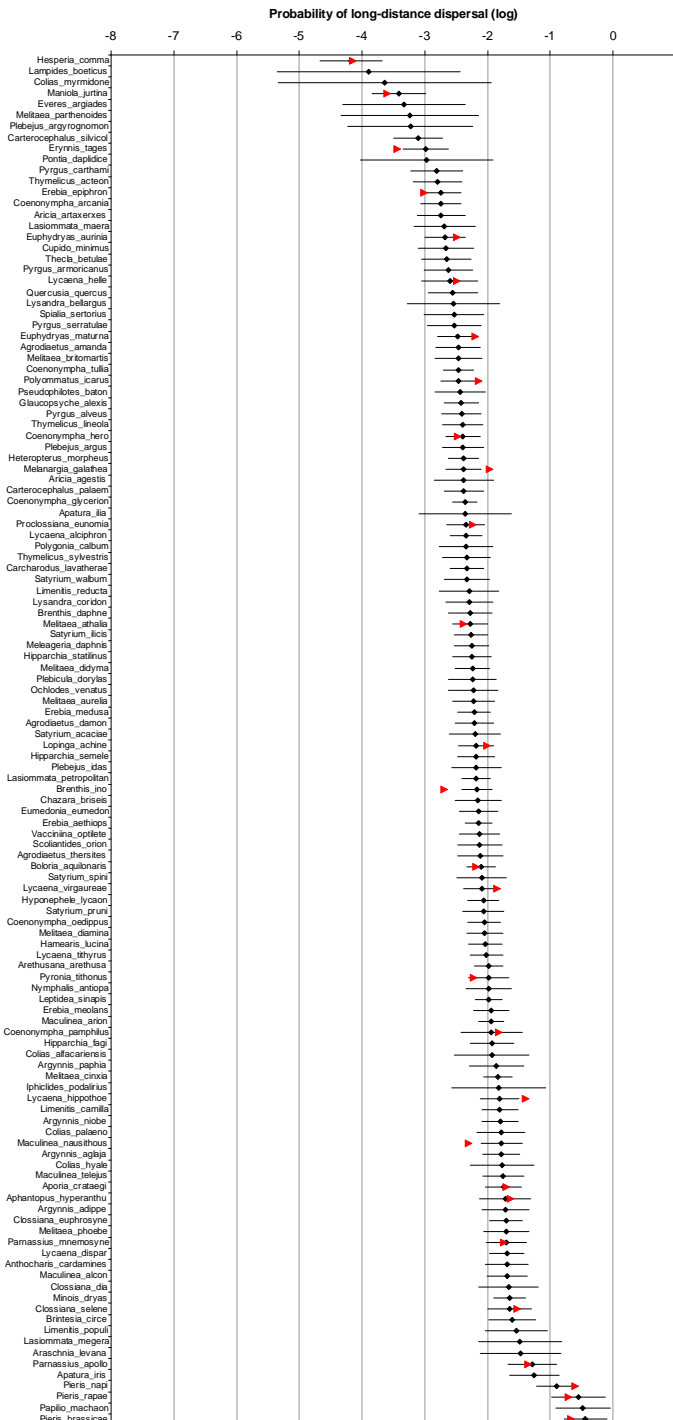

68

69 Figure A8. Probability of long-distance dispersal predicted from life-history traits and wing size for 124 of the

70 142 butterfly species of N-W Europe, and 95%CI of the predictions. Details of the model are shown in Table 3

71 of main text. Red symbols show the observed value for 28 of those species.

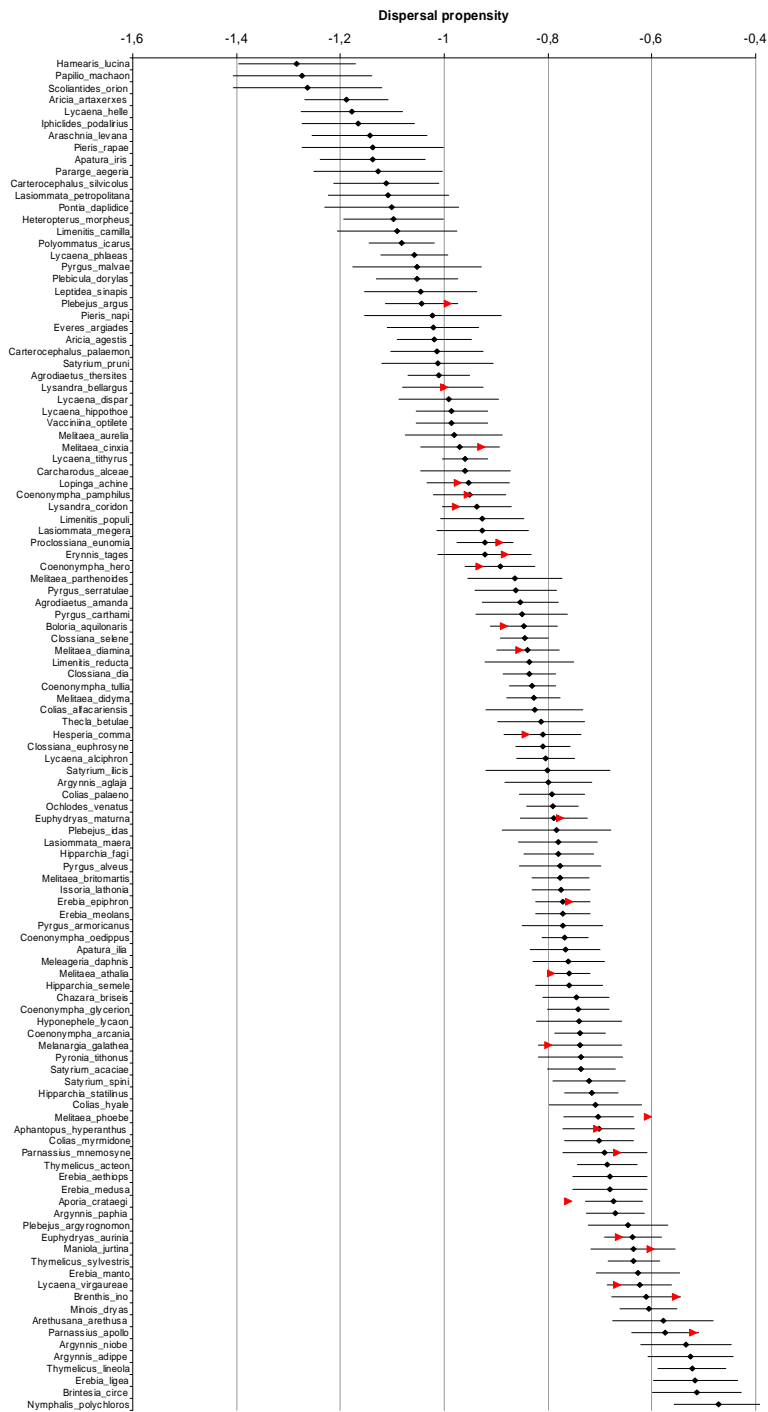

72

73 Figure A9. Dispersal propensity predicted from life-history traits for 113 of the 142 butterfly species of N-W

74 Europe, and 95%CI of the predictions. Details of the model are shown in Table 3 of main text. Red symbols

75 show the observed value for 25 of those species.

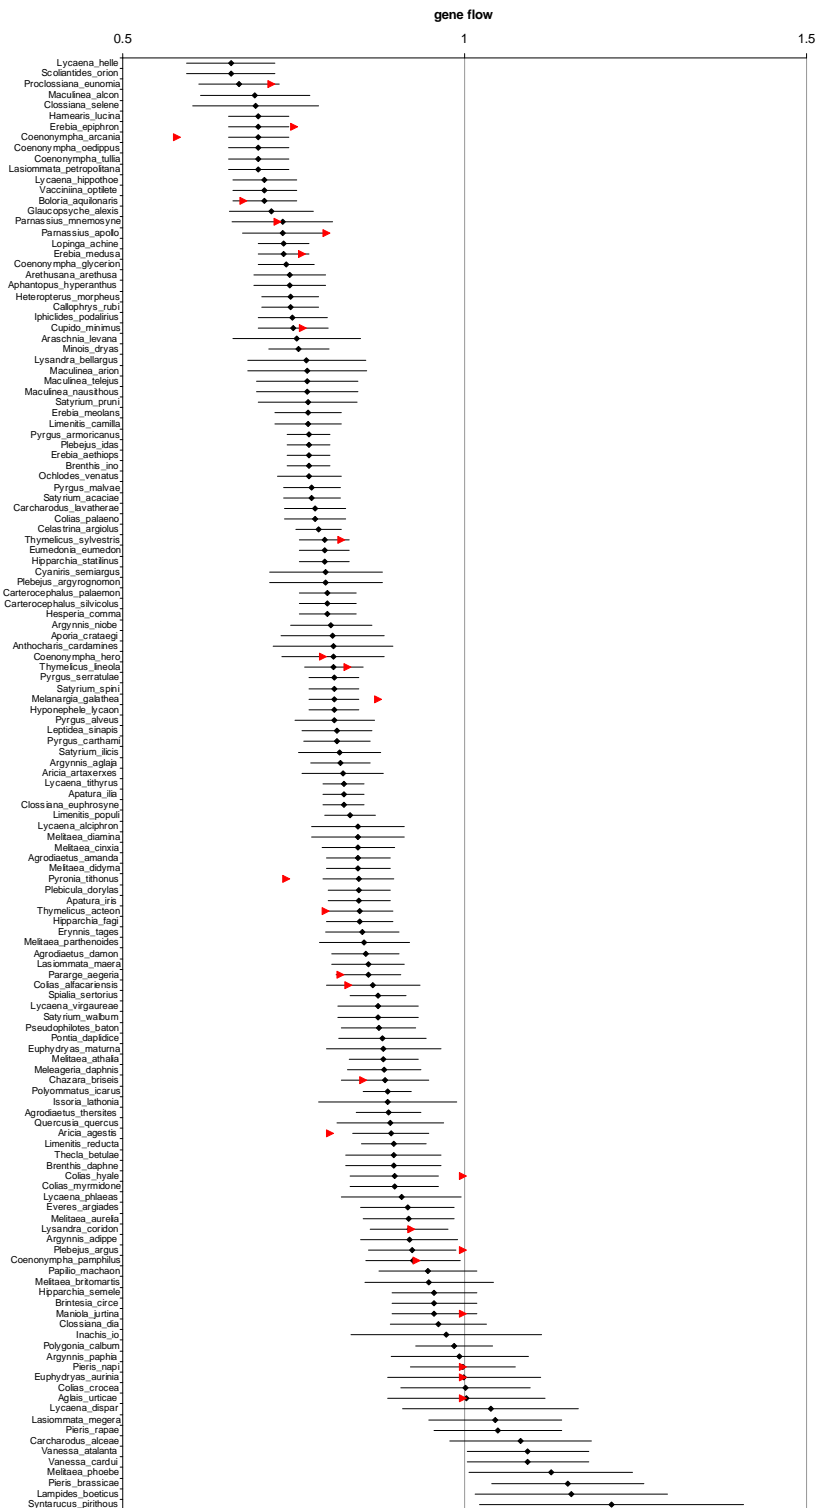

76

77 **Figure A10.** Gene flow predicted from life-history traits for 137 of the 142 butterfly species of N-W Europe, and

78 95% CI of the predictions. Details of the model are shown in Table 3 of main text. Red symbols show the

79 observed value for 26 of those species.
